# Supplementary material
Source: Springer Nature journal article supplement (https://www.springermedizin.de/resource/supplementary/13033_2012_127_MOESM2_ESM.pdf/9651884)

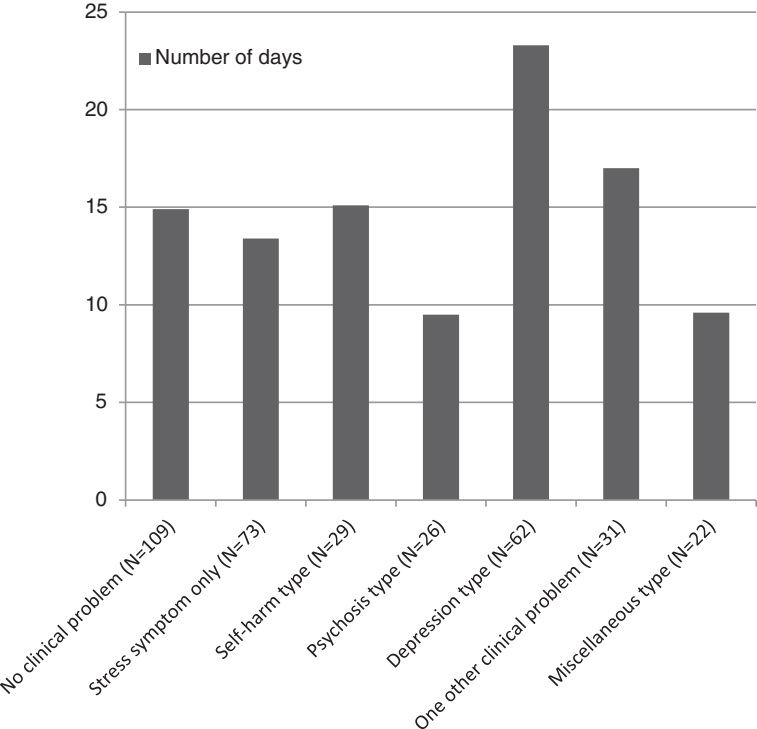

Supplement: MOESM2 [file 9651884]
